# Supplementary material
Source: PubMed Central journal article supplement (PMC3641046)
Supplement: NIHMS2871-supplement-supplement_1.pdf [file NIHMS2871-supplement-supplement_1.pdf]

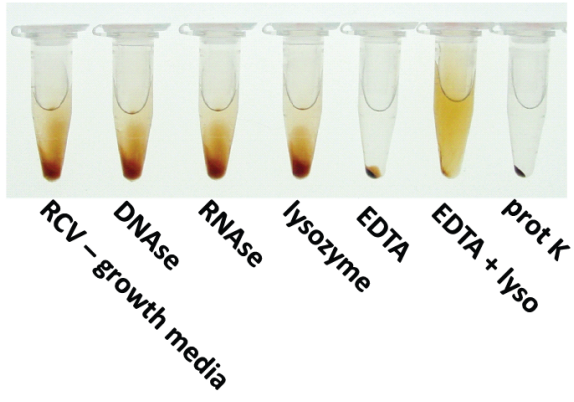

Figure S1

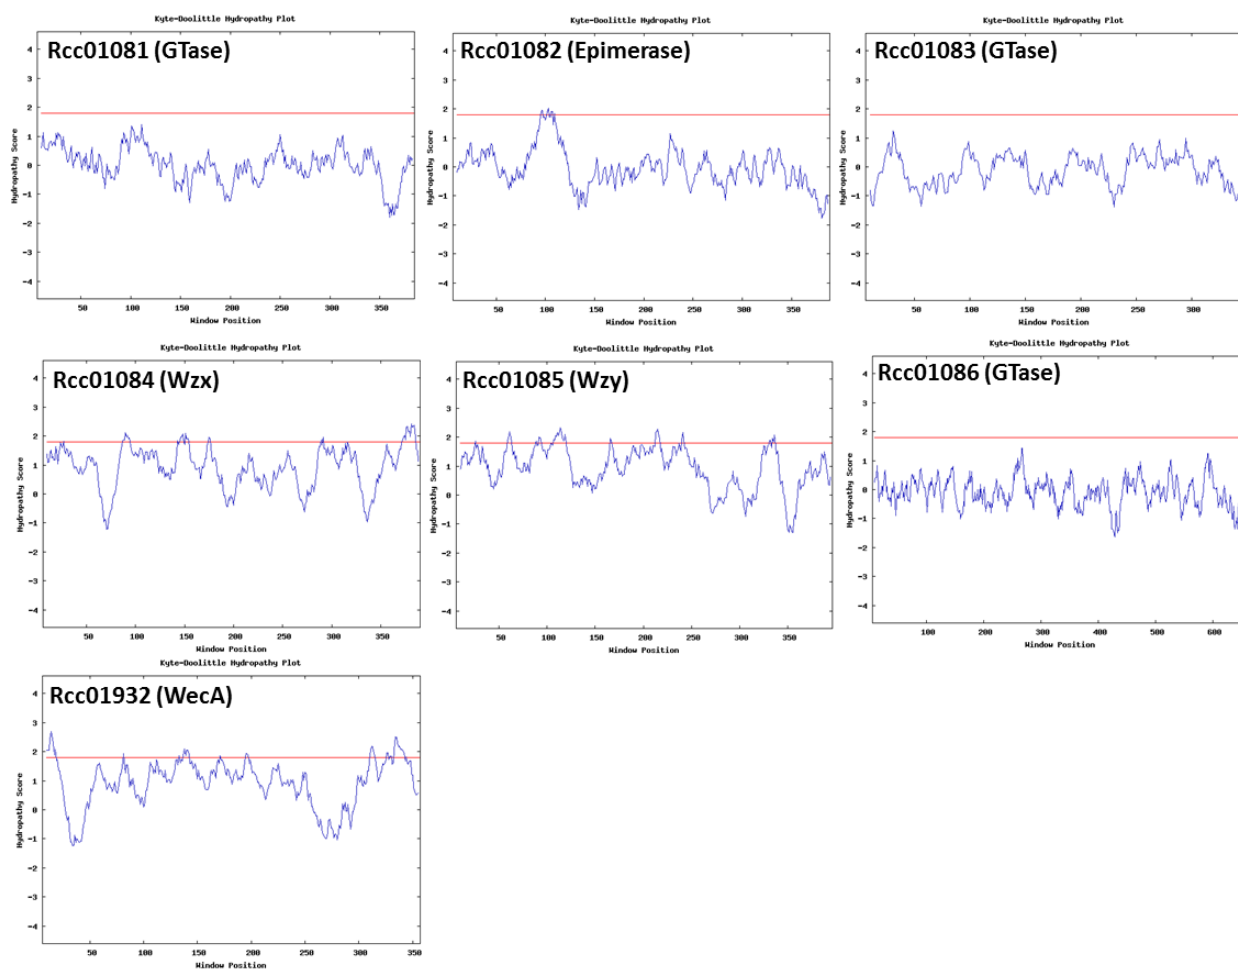

**Figure S2**

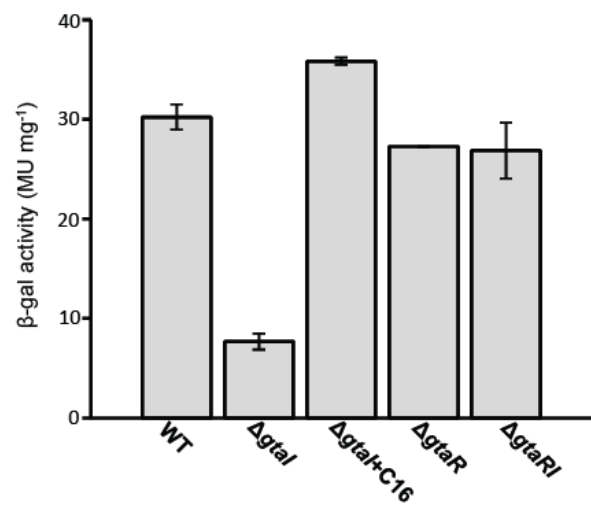

Figure S3

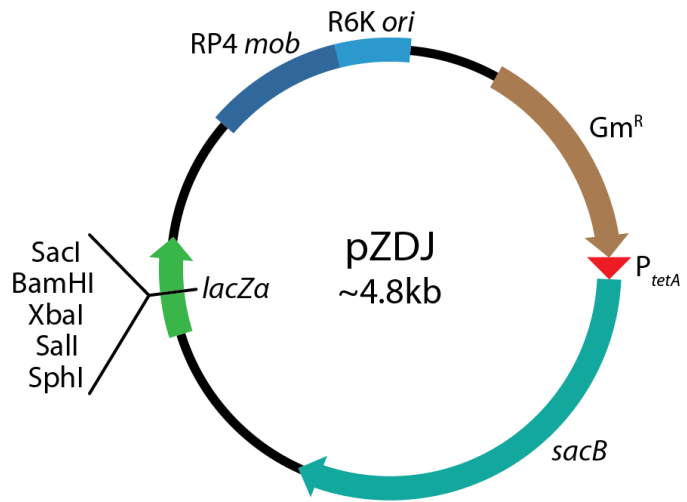

**Figure S4**

**Table S1.** Primers and plasmids used in this study

| <b>Primer Name</b>  | <b>sequence 5' - 3'</b>                                                                | <b>restriction site</b> |
|---------------------|----------------------------------------------------------------------------------------|-------------------------|
| 1081_up_for         | AATGACGTCGACCCGAGCGTTGCCAGTGCG                                                         | Sall                    |
| 1081_up_rev         | TTACCGAAGCTTGCCGTCGGTGTGCAGAC                                                          | HindIII                 |
| 1081_down_for       | CGTTACAAGCTTTTCGGGCTTACGGCCTG                                                          | HindIII                 |
| 1081_down_rev       | ATTACAGAGCTCAATCGACAGCGCATAGCC                                                         | SacI                    |
| 1081_seq_for        | CGCGGGTGTCTTGAC                                                                        | N/A                     |
| 1081_seq_rev        | GCAAGGGTGGCAAGATT                                                                      | N/A                     |
| 1081_comp_for       | CGTTACAAGCTTTCAGCCCTGCGCCGCTTC                                                         | NcoI                    |
| 1081_comp_rev       | CGTTACAAGCTTTCAGCCCTGCGCCGCTTC                                                         | HindIII                 |
| 1081_lacZ_for       | CGACGGCGACCTGCAGGGGGTGGGAA                                                             | PstI                    |
| 1081_lacZ_rev       | TGGCAAGCGCGAGATCTGTGTTGCA                                                              | BglII                   |
| 1932_up_for         | TAGCAGAGCTCTTGGGGTGATCGTGATGA                                                          | SacI                    |
| 1932_up_rev         | GTACAAAGCTTAAGACTGACGACCAGAGA                                                          | HindIII                 |
| 1932_down_for       | GTAGACAAGCTTGGGATCACCTTGCGCTG                                                          | HindIII                 |
| 1932_down_rev       | GTACATCTAGACCATCAGCTTGCCGGTGGG                                                         | XbaI                    |
| 1932_comp_for       | TAGGTGGCCATGGTCCACTCGGCT                                                               | NcoI                    |
| 1932_comp_rev       | TCAGGCTCCGACATCGCAAGCTTGGGCAT                                                          | HindIII                 |
| tetAp_for           | GAATTCCAATTGATGATTCTCCGCCAGCAT                                                         | ApalI                   |
| tetAp_rev           | GAATTCGTGCACCCTCCGGACCAGC                                                              | MfeI                    |
| sacB:accC1_for      | GAATTCGTGCACATGAACATCAAAAAGTTTGC                                                       | MfeI                    |
| sacB:accC1_rev      | GAATTCCAATTGTTAGGTGGCGGTACTTG                                                          | ApaLI                   |
|                     |                                                                                        |                         |
| <b>Plasmid Name</b> | <b>Fragment/description</b>                                                            | <b>Reference</b>        |
| pUC81UP             | upstream flank of <i>rcc01081</i> as Sall-HindIII frag; <b>Amp<sup>R</sup></b>         | This Study              |
| pUC81DOWN           | downstream flank of <i>rcc01081</i> as HindIII-SacI; <b>Amp<sup>R</sup></b>            | This Study              |
| pZDJΔ1081           | <i>rcc01081</i> upstream+downstream ligated into suicide vector; <b>Gm<sup>R</sup></b> | This Study              |
| pIND1081            | <i>rcc01081</i> ORF as NcoI-HindIII frag; <b>Km<sup>R</sup></b>                        | This Study              |
| pUC32UP             | upstream flank of <i>rcc01932</i> as SacI-HindIII frag; <b>Amp<sup>R</sup></b>         | This Study              |
| pUC32DOWN           | downstream flank of <i>rcc01932</i> as HindIII-XbaI frag; <b>Amp<sup>R</sup></b>       | This Study              |
| pZDJΔ1932           | <i>rcc01932</i> upstream+downstream ligated into suicide vector; <b>Gm<sup>R</sup></b> | This Study              |

|                                        |                                                                                                     |                             |
|----------------------------------------|-----------------------------------------------------------------------------------------------------|-----------------------------|
| pIND1932                               | <i>rcc01932</i> ORF as NcoI-HindIII frag; <b>Km<sup>R</sup></b>                                     | This Study                  |
| pUC19                                  | general cloning vector; lacZ $\alpha$ ; <b>Amp<sup>R</sup></b>                                      | Invitrogen                  |
| pZJD29a                                | suicide vector; contains <i>sacB</i> gene; <b>Gm<sup>R</sup></b>                                    | Unpublished                 |
| pZDJ                                   | pZJD29a; <i>puc</i> promoter replaced with <i>tetA</i> promoter<br><b>Gm<sup>R</sup></b>            | This Study                  |
| pIND4                                  | Inducible expression vector; <b>Km<sup>R</sup></b>                                                  | Ind et al., 2009            |
| pXC01081                               | ~1500bp 5' of ORF <i>rcc01081</i> fused to lacZ;<br>translationally in frame; <b>Tc<sup>R</sup></b> | This Study                  |
| pXCA601                                | promoter probe vector; for construction of<br>promoter::lacZ fusions; <b>Tc<sup>R</sup></b>         | (Adams et al.,<br>1989)     |
|                                        |                                                                                                     |                             |
| <b><i>R. capsulatus</i><br/>strain</b> | <b>Description</b>                                                                                  | <b>Reference</b>            |
| B10                                    | wild type isolate; encapsulated                                                                     | Weaver et al., 1975         |
| DE442                                  | RcGTA overproducer; believed to originate from Y262                                                 | Yen et al., 1979            |
| 37b4                                   | wild type isolate; non-encapsulated                                                                 | (Weckesser et al.,<br>1972) |
| $\Delta gtaI$                          | markerless deletion of <i>gtaI</i> gene ( <i>rcc00329</i> ); B10<br>background                      | Leung et al., 2012          |
| $\Delta gtaR$                          | markerless deletion of <i>gtaR</i> gene ( <i>rcc00328</i> ); B10<br>background                      | Leung et al., 2012          |
| $\Delta gtaRI$                         | double deletion of <i>gtaI</i> and <i>gtaR</i> genes; B10 background                                | Leung et al., 2012          |
| $\Delta 1081$                          | markerless deletion of <i>rcc01081</i> ; B10 background                                             | This Study                  |
| $\Delta gtaI/\Delta 1081$              | double deletion of <i>gtaI</i> and <i>rcc01081</i> ; B10 background                                 | This Study                  |
| $\Delta 1932$                          | markerless deletion of <i>rcc01932</i> ; B10 background                                             | This Study                  |
| $\Delta 1932/\Delta 1081$              | markerless deletion of <i>rcc01932</i> and <i>rcc01081</i> ; B10<br>background                      | This Study                  |

**Table S2.** Growth Curve Data: A statistical measure of correlation using a linear regression analysis.

|                                               |                 |
|-----------------------------------------------|-----------------|
| <b>recipient capability assay</b>             |                 |
| Number of XY pairs                            | <b>7</b>        |
| Pearson r                                     | 0.9501          |
| 95% conf. interval                            | 0.693-<br>0.992 |
| p-value                                       | 0.00104         |
| Correlation significant?<br>( $\alpha=0.05$ ) | yes             |
| R squared                                     | 0.9028          |
|                                               |                 |
| <b>adsorption assay</b>                       |                 |
| Number of XY pairs                            | <b>7</b>        |
| Pearson r                                     | 0.9571          |
| 95% conf. interval                            | 0.731-<br>0.993 |
| p-value                                       | 0.000715        |
| Correlation significant?<br>( $\alpha=0.05$ ) | yes             |
| R squared                                     | 0.9162          |

**Table S3.** One-way ANOVA results for comparison of RcGTA recipient ability

| <b>Strain 1</b> | <b>Strain 2</b>          | <b>p-value</b> |
|-----------------|--------------------------|----------------|
| WT B10          | <i>ΔgtaI</i>             | 0.0000558      |
| WT B10          | <i>ΔgtaI</i> + C16       | 0.9993916      |
| WT B10          | <i>ΔgtaR</i>             | 1              |
| WT B10          | <i>ΔgtaRI</i>            | 1              |
| WT B10          | <i>Δ108I</i>             | 0.0000936      |
| WT B10          | <i>Δ108I</i> [p1081]     | 0.0324655      |
| WT B10          | <i>ΔgtaI/Δ108I</i>       | 0.0001958      |
| WT B10          | <i>ΔgtaI/Δ108I</i> + C16 | 0.0000894      |
| WT B10          | <i>Δ1932</i>             | 0.000061       |
| WT B10          | <i>Δ1932</i> [p1932]     | 0.4535225      |
| WT B10          | <i>Δ108I/Δ1932</i>       | 0.0000385      |
| WT B10          | 37b4                     | 0.0000333      |
| <i>Δ108I</i>    | <i>Δ108I</i> [p1081]     | 0.492496       |



**Table S4.** One-way ANOVA results for comparison of RcGTA adsorption ability

| <b>Strain 1</b> | <b>Strain 2</b>          | <b>p-value</b> |
|-----------------|--------------------------|----------------|
| No Cells        | WT B10                   | 0              |
| No Cells        | <i>Δgtal</i>             | 0.3630966      |
| No Cells        | <i>Δgtal</i> + C16       | 0              |
| No Cells        | <i>Δgtar</i>             | 0              |
| No Cells        | <i>ΔgtarI</i>            | 0              |
| No Cells        | <i>Δ1081</i>             | 0.0332213      |
| No Cells        | <i>Δ1081</i> [p1081]     | 0              |
| No Cells        | <i>Δgtal/Δ1081</i>       | 1E-07          |
| No Cells        | <i>Δgtal/Δ1081</i> + C16 | 0              |
| No Cells        | <i>Δ1932</i>             | 0.9930653      |
| No Cells        | <i>Δ1932</i> [p1932]     | 0              |
| No Cells        | <i>Δ1081/Δ1932</i>       | 0.7869396      |
| No Cells        | 37b4                     | 0.9982706      |
| <i>Δ1081</i>    | <i>Δ1081</i> [p1081]     | 0.0000007      |
| <i>Δgtal</i>    | <i>Δgtal</i> + C16       | 0.0000001      |

**Table S5.** One-way ANOVA results for comparison of carbohydrate production

| Strain 1     | Strain 2                 | p-value  |
|--------------|--------------------------|----------|
| WT B10       | <i>Δgtal</i>             | 0        |
| WT B10       | <i>Δgtal</i> + C16       | 2E-07    |
| WT B10       | <i>ΔgtaR</i>             | 6.84E-05 |
| WT B10       | <i>ΔgtaRI</i>            | 0.165229 |
| WT B10       | <i>Δ1081</i>             | 0        |
| WT B10       | <i>Δ1081</i> [p1081]     | 0.005464 |
| WT B10       | <i>Δgtal/Δ1081</i>       | 0        |
| WT B10       | <i>Δgtal/Δ1081</i> + C16 | 0        |
| WT B10       | <i>Δ1932</i>             | 0        |
| WT B10       | <i>Δ1932</i> [p1932]     | 0.00004  |
| WT B10       | <i>Δ1081/Δ1932</i>       | 0        |
| WT B10       | 37b4                     | 0        |
| <i>Δgtal</i> | <i>Δgtal</i> + C16       | 0        |
| <i>Δ1081</i> | <i>Δ1081</i> [p1081]     | 0        |
| <i>Δ1932</i> | <i>Δ1932</i> [p1932]     | 0        |

**Table S6.** One-way ANOVA results for comparison of  $\beta$ -galactosidase activities

| <b>Strain 1</b>                | <b>Strain 2</b>                      | <b>p-value</b> |
|--------------------------------|--------------------------------------|----------------|
| WT B10                         | <i><math>\Delta</math>gtal</i>       | 9.75E-05       |
| WT B10                         | <i><math>\Delta</math>gtal</i> + C16 | 0.053569       |
| WT B10                         | <i><math>\Delta</math>gtar</i>       | 0.353396       |
| WT B10                         | <i><math>\Delta</math>gtarI</i>      | 0.266044       |
| <i><math>\Delta</math>gtal</i> | <i><math>\Delta</math>gtal</i> + C16 | 3.27E-05       |

**Table S7.** One-way ANOVA results for comparison of RcGTA adsorption inhibition ability

| <b>Strain 1</b> | <b>Strain 2</b>                         | <b>p-value</b> |
|-----------------|-----------------------------------------|----------------|
| No Cells        | WT                                      | 0              |
| WT              | WT extracts                             | 1.3E-06        |
| WT              | <i><math>\Delta</math>gtal</i> extracts | 0.881878       |
| WT              | <i><math>\Delta</math>1932</i> extracts | 0.999761       |
